# Supplementary material for: When 'Asking for More' Replaces 'Working for It': Reliability and Validity of the Academic Entitlement Scale in Egyptian Higher Education
Source: Research Square preprint supplement (doi:10.21203/rs.3.rs-6351850/v1), 2025-04-08
Supplement: Supplementary file 1 [file 0ae7c4dfc124353da24c2429.docx]

**Academic Entitlement Scale**

**Instructions**

Below is a set of statements that describe students' beliefs and expectations regarding academic environments and achievements. Please read each statement carefully and indicate to what extent you agree or disagree with each statement using the following scale:

1 = Strongly Disagree

2 = Disagree

3 = Neutral

4 = Agree

5 = Strongly Agree

1. When I receive a poor grade, it's usually because the instructor didn't explain the material well.
2. My academic performance is more dependent on the quality of teaching than my own study efforts.
3. If I fail an assignment, it's typically because the instructions were unclear.
4. The grading system is unfair and doesn't accurately reflect my true capabilities.
5. Instructors should adjust their teaching style to match my learning preferences.
6. When I struggle academically, it's often due to external circumstances beyond my control.
7. The university environment doesn't provide enough support for my academic success.
8. My poor grades are a result of poorly designed assessments, not my understanding.
9. Instructors are responsible for ensuring my academic progress.
10. External factors like personal stress always impact my academic performance more than my own efforts.
11. I expect to receive high grades simply by attending classes.
12. Instructors should provide multiple opportunities to improve my grade.
13. I deserve special consideration in grading due to my unique circumstances.
14. An instructor should modify course requirements if they seem too challenging.
15. I expect detailed, personalized feedback on every assignment.
16. Grades should reflect my potential, not just my actual performance.
17. Instructors must be available to me at all times for consultation.
18. I should receive advanced notice of any academic challenges.
19. Course policies should be flexible to accommodate my individual needs.
20. I expect automatic grade bumps or extra credit opportunities.
21. Since I pay tuition, I should have more say in how courses are conducted.
22. My status as a paying student entitles me to preferential treatment.
23. The university should cater to my specific learning preferences.
24. I expect high-quality service in exchange for my tuition fees.
25. Instructors work for me because I'm paying for their services.
26. The university should provide immediate solutions to any academic issues I encounter.
27. My financial contribution should guarantee a certain academic outcome.
28. I should be able to negotiate course requirements.
29. The university's primary goal is to satisfy my educational demands.
30. My tuition payment guarantees my right to a specific learning experience.
31. I should receive high grades without putting in extensive study time.
32. Academic achievements should be based more on potential than actual work.
33. Minimal effort should be sufficient to pass or excel in courses.
34. I expect recognition and rewards without demonstrating substantial skills.
35. Completing basic course requirements should automatically result in top grades.
36. The difficulty of achieving an academic goal should be minimized.
37. I believe talent is more important than hard work in academic success.
38. Studying intensively is unnecessary if I'm naturally intelligent.
39. I expect to succeed academically with minimal personal investment.
40. Academic rewards should be granted based on perceived ability, not demonstrated performance.
41. I should have the right to determine course meeting times.
42. Instructors must adapt their teaching methods to my preferred learning style.
43. I expect to choose which course components I want to engage with.
44. The syllabus should be negotiable based on student preferences.
45. I should be able to modify assignment requirements.
46. Classroom policies should be decided democratically by students.
47. I expect to have a say in the evaluation methods used in courses.
48. Technology and teaching tools should be selected based on student input.
49. Course content should be adjusted to match my interests.
